# Supplementary material for: Water tracks intensify surface energy and mass exchange in the Antarctic McMurdo Dry Valleys
Source: Copernicus journal article supplement (doi:10.5194/tc-2019-8), 2019-01-28

Period: 2012-12-26 – 2013-01-21

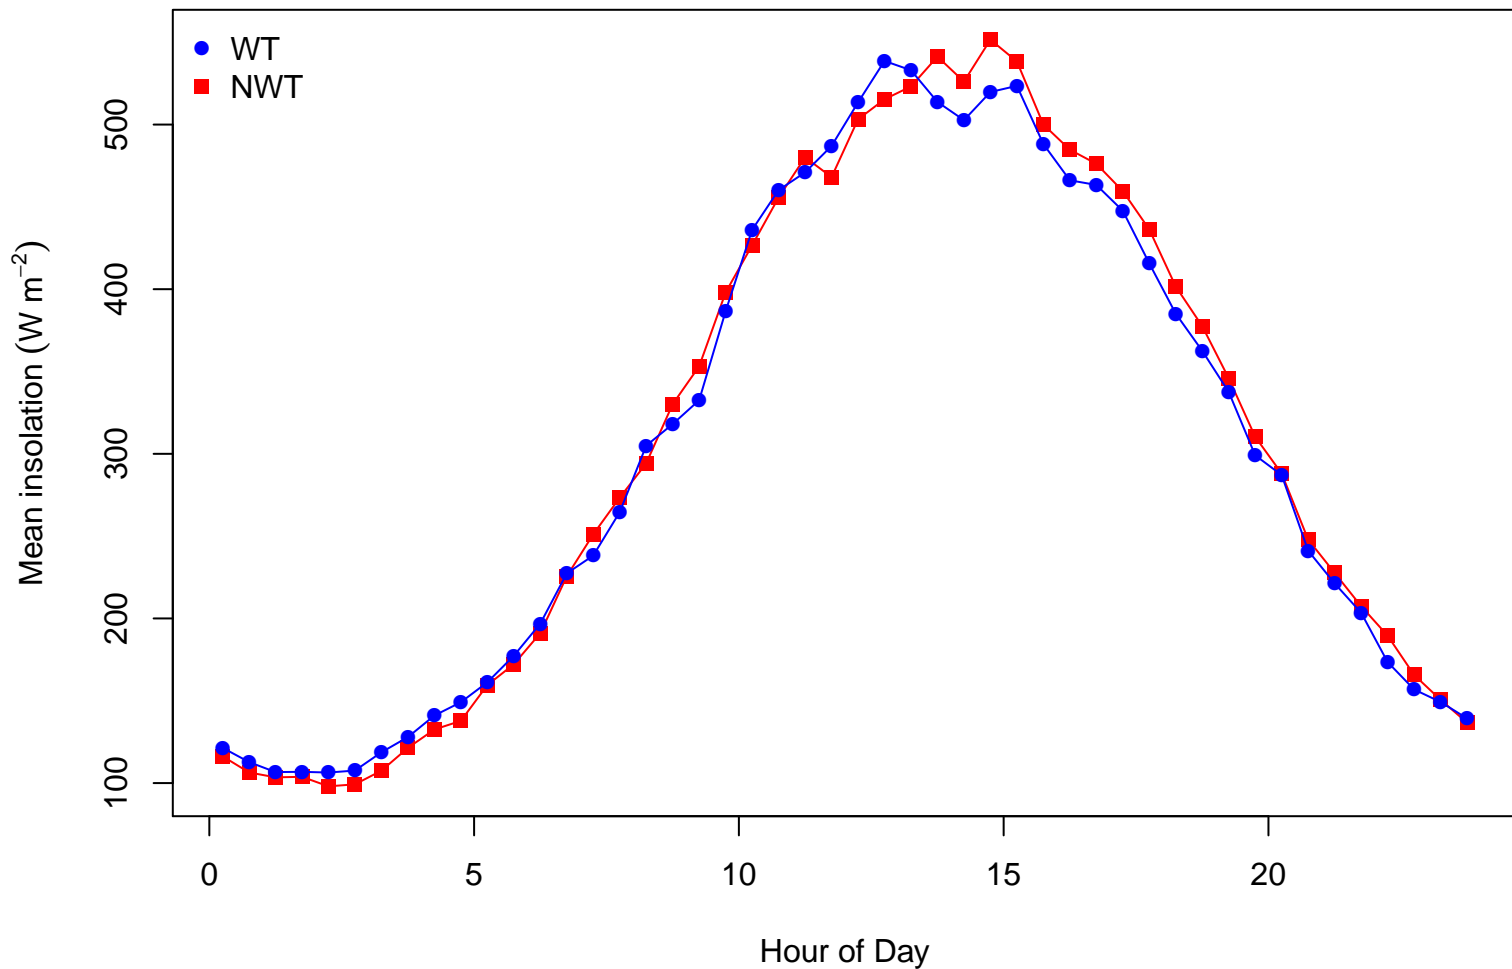

Supplement: Supplementary file [file Meaninsolations.pdf › Meaninsolations.pdf]
